# Supplementary material
Source: HighWire-hosted journal article supplement (https://jnis.bmj.com/content/11/10/1036)
Supplement: inline-supplementary-material-1 [file inline-supplementary-material-1.pdf]

**Supplemental Table -1**

| Technology                         | Pixel Density                        | Total Pixels | Distal Tip    | Rigid Tip     | Minimum Bend Radius |
|------------------------------------|--------------------------------------|--------------|---------------|---------------|---------------------|
| <b>Current CFB-Microangioscope</b> | <b>113,000 pixels/mm<sup>2</sup></b> | <b>3,000</b> | <b>1.7 Fr</b> | <b>0.5 mm</b> | <b>5 mm</b>         |
| Prior CFB                          | 113,000 pixels/mm <sup>2</sup>       | 30,000       | 3 Fr          | 1.5 mm        | 25 mm               |
| CMOS (Chip-on-tip)                 | 238,000 pixels/mm <sup>2</sup>       | 48,000       | 3 Fr          | 5 mm          | 5 mm                |
| SFE                                | 345,000 pixels/mm <sup>2</sup>       | 196,000      | 3.7 Fr        | 9 mm          | 6 mm                |
